# Supplementary material
Source: PubMed Central journal article supplement (PMC9544597)
Supplement: ANA-92-270-s002.pdf [file ANA-92-270-s002.pdf]

**Supplementary Table 2.** Demographic and clinical characteristics of the COURAGE-PD cohort.

| Principal Investigators | Country      | Ancestry        | Cases (N)   | Controls (N) | Total (N)    | Female cases (%) | Female controls (%) | Case age at enrolment (mean, SD in years) | Control age at enrolment (mean, SD in years) |
|-------------------------|--------------|-----------------|-------------|--------------|--------------|------------------|---------------------|-------------------------------------------|----------------------------------------------|
| Aasly                   | Norway       | European        | 510         | 509          | 1019         | 40%              | 45.2%               | 77.7(11.6)                                | NA                                           |
| Bardien/Carr            | South Africa | European        | 170         | 85           | 255          | 38.8%            | 43.5%               | 68.7(10.6)                                | 51.1(12.7)                                   |
| Annesi                  | Italy        | European        | 93          | 94           | 187          | 35.5%            | 54.3%               | 66.5(9.0)                                 | 58.2(20.3)                                   |
| Brice                   | France       | European        | 851         | 280          | 1131         | 41.6%            | 43.6%               | 60.7(10.9)                                | 62.4(10.7)                                   |
| Brighina                | Italy        | European        | 48          | 40           | 88           | 20.8%            | 40%                 | 66.3(9.8)                                 | 66.7(5.3)                                    |
| Carmine                 | Sweden       | European        | 286         | 629          | 915          | 38.5%            | 44.8%               | 67.4(10.3)                                | NA                                           |
| Chartier-Harlin         | France       | European        | 370         | 228          | 598          | 45.7%            | 60.1%               | 64.3(9.0)                                 | 59.9(12.6)                                   |
| Deutschlander           | Germany      | European        | 285         | 46           | 331          | 38.2%            | 69.6%               | 69.4(9.9)                                 | 66.0(10.3)                                   |
| Elbaz                   | France       | European        | 455         | 1066         | 1521         | 40.2%            | 40.8%               | 70.1(7.4)                                 | 69.8(7.6)                                    |
| Farrer                  | USA          | European        | 389         | 409          | 798          | 34.4%            | 68.2%               | 67.7(10.3)                                | 69.4(12.4)                                   |
| Ferreira                | Portugal     | European        | 415         | 67           | 482          | 42.9%            | 74.6%               | 69.0(10.1)                                | 47.1(17.8)                                   |
| Gasser/Sharma           | Germany      | European        | 681         | 549          | 1230         | 36.4%            | 56.6%               | 64.9(10.9)                                | 61.9(7.8)                                    |
| Goldwurm                | Italy        | European        | 1391        | 1370         | 2761         | 40.8%            | 66.3%               | 65.8(10.8)                                | 61.9(10.9)                                   |
| Hadjigeorgiou           | Greece       | European        | 283         | 314          | 597          | 51.6%            | 52.9%               | 67.9(10.3)                                | 69.8(8.7)                                    |
| Koks                    | Estonia      | European        | 216         | 170          | 386          | 60.2%            | 58.2%               | 73.0(8.2)                                 | 72.3(10.2)                                   |
| Krainc                  | USA          | European        | 59          | 16           | 75           | 25.4%            | 81.2%               | 64.7(10.7)                                | 61.4(11.7)                                   |
| Mellick                 | Australia    | European        | 480         | 508          | 988          | 36.0%            | 54.7%               | 68.3(9.3)                                 | 66.9(9.6)                                    |
| Pchelina                | Russia       | European        | 15          | 5            | 20           | 46.7%            | 80%                 | 60.7(6.4)                                 | 59.8(20.0)                                   |
| Puschmann               | Sweden       | European        | 110         | 105          | 215          | 37.3%            | 70.5%               | 68.8(10.6)                                | 66.7(8.9)                                    |
| Rogaeva                 | Canada       | European        | 215         | 153          | 368          | 34.0%            | 62.1%               | 63.6(12.4)                                | 73.8(8.6)                                    |
| Stefanis                | Greece       | European        | 242         | 181          | 423          | 38.4%            | 64.1%               | 67.1(13.5)                                | 67.0(9.6)                                    |
| Valente                 | Italy        | European        | 326         | 54           | 380          | 37.7%            | 61.1%               | 67.0(12.1)                                | 78.4(9.6)                                    |
| Wirdefeldt              | Sweden       | European        | 147         | 176          | 323          | 44.2%            | 54.5%               | 72.2(9.3)                                 | 73.5(9.7)                                    |
| Zimprich                | Austria      | European        | 598         | 184          | 782          | 36.6%            | 59.2%               | 66.8(11.3)                                | NA                                           |
| Kruger                  | Luxembourg   | European        | 333         | 360          | 693          | 32.7%            | 44.2%               | 67.4(11.2)                                | 58.1(11.9)                                   |
| <b>TOTAL</b>            | -            | <b>European</b> | <b>8968</b> | <b>7598</b>  | <b>16566</b> |                  |                     |                                           |                                              |

**Supplementary Table 3.** Demographic and clinical characteristics of the AMP-PD cohort.

| Study        | Cases (N)   | Controls (N) | Total (N)   | Female cases (%) | Female control (%) | Case age at onset (mean, SD in years) | Control age at last exam (mean, SD in years) |
|--------------|-------------|--------------|-------------|------------------|--------------------|---------------------------------------|----------------------------------------------|
| BIOFIND      | 75          | 56           | 131         | 38.7             | 48.2               | 67.5(6.2)                             | 65.4(7.2)                                    |
| HBS          | 524         | 392          | 916         | 36.3             | 64.0               | 61.5(10.6)                            | 68.5(10.3)                                   |
| LBD          | -           | 1759         | 1759        | -                | 49.5               | -                                     | 71.9(13.5)                                   |
| SURE-PD3     | 227         | -            | 227         | 49.3             | -                  | 62.3(9.5)                             | -                                            |
| PDBP         | 767         | 437          | 1204        | 35.6             | 55.1               | 59.6(10.6)                            | 62.8(10.8)                                   |
| PPMI         | 381         | 173          | 554         | 35.7             | 34.1               | 62.0(9.6)                             | 61.0(10.4)                                   |
| STEADY-PD3   | 274         | -            | 274         | 30.7             | -                  | 62.7(9.2)                             | -                                            |
| <b>TOTAL</b> | <b>2248</b> | <b>2817</b>  | <b>5065</b> |                  |                    |                                       |                                              |

NA: Not Applicable

**Supplementary Table 4.** PD cases and controls in each quantile of polygenic risk scores per cohort.

| Quantiles    | IPDGC       |             | COURAGE-PD  |             | UKBB        |            | AMP-PD     |            |
|--------------|-------------|-------------|-------------|-------------|-------------|------------|------------|------------|
|              | Controls    | Cases       | Controls    | Cases       | Controls    | Cases      | Controls   | Cases      |
| 1 (0 - 25%)  | 2353        | 926         | 1900        | 1520        | 3575        | 507        | 704        | 389        |
| 2 (26 - 50%) | 2353        | 1396        | 1899        | 1961        | 3575        | 606        | 704        | 475        |
| 3 (51- 75%)  | 2353        | 1869        | 1899        | 2384        | 3575        | 678        | 704        | 585        |
| 4 (76- 100%) | <b>2353</b> | <b>3011</b> | <b>1900</b> | <b>3102</b> | <b>3576</b> | <b>847</b> | <b>705</b> | <b>798</b> |
| Total        | 9412        | 7204        | 7598        | 8968        | 14301       | 2639       | 2817       | 2248       |

**Supplementary Table 5.** Meta-GWAS summary statistics for the sub-top loci associated with PD resilience.

| SNP        | CHR | BP        | Nearest Gene     | Variant type | Effect allele | Other allele | Frequency | Beta (SE)     | P value  | I <sup>2</sup> | Beta(SE) in Risk GWAS | P value in Risk GWAS |
|------------|-----|-----------|------------------|--------------|---------------|--------------|-----------|---------------|----------|----------------|-----------------------|----------------------|
| rs62325099 | 4   | 190552831 | <i>LINC01262</i> | Intergenic   | T             | C            | 0.569     | -0.328(0.061) | 1.03e-07 | NA             | 0.089(0.069)          | 0.206                |
| rs2652202  | 5   | 77095148  | <i>TBCA</i>      | Intergenic   | T             | C            | 0.645     | 0.127(0.024)  | 1.64e-07 | 0              | -0.023(0.022)         | 0.303                |
| rs12245509 | 10  | 91752990  | <i>LINC01375</i> | Intergenic   | A             | G            | 0.940     | -0.248(0.049) | 5.21e-07 | 0              | 0.016(0.045)          | 0.721                |
| rs292289   | 18  | 5198809   | <i>C18orf42</i>  | Intergenic   | C             | A            | 0.144     | -0.301(0.056) | 9.85e-08 | NA             | -0.020(0.043)         | 0.641                |

SNP: single nucleotide polymorphism, CHR: chromosome, BP: base pair, SE: standard error. NA: not applicable. rs62325099 and rs292289 were only present in the discovery dataset (IPDGC). Risk GWAS means the Mike Nalls *et al.* 2019 PD GWAS.

**Supplementary Table 6.** Pearson correlation between risk and resilience scores in four groups of genetic cohorts.

| Cohort     | Group             | Pearson's r | 95%CI          | P               |
|------------|-------------------|-------------|----------------|-----------------|
| IPDGC      | Control           | 0.132       | 0.111, 0.151   | <b>2.20E-16</b> |
| IPDGC      | PD                | -0.092      | -0.115, -0.069 | <b>2.20E-16</b> |
| IPDGC      | Resilient-control | -0.027      | -0.100, 0.0457 | 0.464           |
| IPDGC      | Risk-matching-PD  | -0.001      | -0.067, 0.065  | 0.970           |
| COURAGE-PD | Control           | 0.022       | -0.001, 0.044  | 0.058           |
| COURAGE-PD | PD                | -0.013      | -0.033, -0.008 | 0.226           |
| COURAGE-PD | Resilient-control | 0.005       | -0.040, 0.050  | 0.823           |
| COURAGE-PD | risk-matching-PD  | -0.021      | -0.057, -0.014 | 0.233           |
| AMP-PD     | Control           | 0.0004      | -0.036, 0.037  | 0.982           |
| AMP-PD     | PD                | -0.004      | -0.045, 0.037  | 0.843           |
| AMP-PD     | Resilient-control | -0.028      | -0.102, 0.045  | 0.451           |
| AMP-PD     | Risk-matching-PD  | -0.018      | -0.087, 0.052  | 0.615           |
| UKBB       | Control           | 0.006       | -0.010, 0.022  | 0.471           |
| UKBB       | PD                | -0.012      | -0.051, 0.026  | 0.523           |
| UKBB       | Resilient-control | 0.009       | -0.023, 0.042  | 0.571           |
| UKBB       | Risk-matching-PD  | -0.011      | -0.078, 0.056  | 0.745           |

Significant values are highlighted in bold.

**Supplementary Table 7.** Top ten ranked pathways associated with PD resilience.

| Gene Set                                                               | N Genes | Beta  | Beta STD | SE    | P value  | Pbon         |
|------------------------------------------------------------------------|---------|-------|----------|-------|----------|--------------|
| GO_bp:go_histone_h3_k9_dimethylation                                   | 5       | 1.370 | 0.024    | 0.292 | 1.36e-06 | <b>0.021</b> |
| Curated_gene_sets:burton_adipogenesis_7                                | 40      | 0.582 | 0.028    | 0.137 | 1.16e-05 | 0.18         |
| GO_mf:go_selenium_binding                                              | 7       | 1.446 | 0.026    | 0.326 | 5.25e-05 | 0.81         |
| GO_cc:go_vcb_complex                                                   | 6       | 1.500 | 0.028    | 0.390 | 5.98e-05 | 0.92         |
| Curated_gene_sets:davicioni_pax_foxo1_signature_in_arms_up             | 48      | 0.473 | 0.025    | 0.130 | 0.000128 | 1            |
| GO_bp:go_protein_localization_to_membrane                              | 515     | 0.128 | 0.022    | 0.036 | 0.000169 | 1            |
| GO_mf:go_calcium_channel_regulator_activity                            | 45      | 0.444 | 0.023    | 0.126 | 0.000214 | 1            |
| GO_bp:go_positive_regulation_of_voltage_gated_calcium_channel_activity | 12      | 0.812 | 0.022    | 0.233 | 0.000242 | 1            |
| GO_cc:go_microbody_membrane                                            | 53      | 0.336 | 0.019    | 0.097 | 0.000260 | 1            |
| Curated_gene_sets:torchia_targets_of_ewsr1_fli1_fusion_dn              | 268     | 0.183 | 0.023    | 0.053 | 0.000290 | 1            |

MAGMA gene-set analysis is performed for curated gene sets and gene ontology (GO) terms obtained from MsigDB. GO\_bp: GO biological process, GO\_mf: GO molecular function, GO\_cc: GO cellular component, N Genes: the number of genes in the data that was in the set, BETA: the regression coefficient of the variable, BETA STD: the semi-standardized regression coefficient, corresponding to the predicted change in Z-value given a change of one standard deviation in the predictor gene set/gene covariate (i.e., BETA divided by the variable's standard deviation), SE: the standard error of the regression coefficient, P<sub>bon</sub>: Bonferroni adjusted p-value.

**Supplementary Figure 1.** Density plots displaying genetic risk profiling for PD cases and controls.

**A. IPDGC**

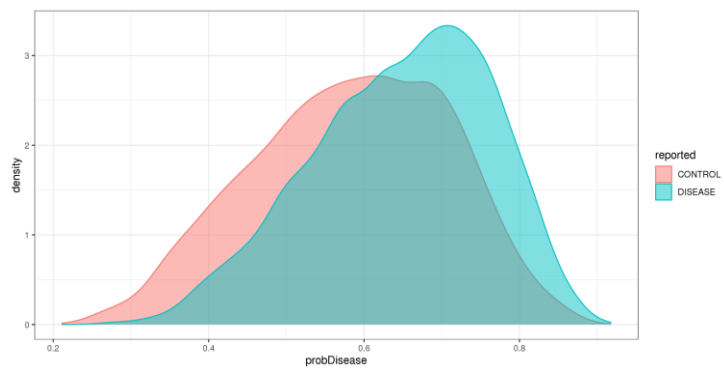

**B. COURAGE-PD**

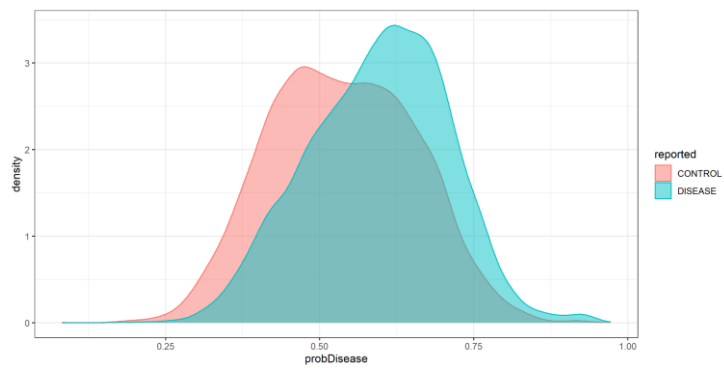

**C. UKBB**

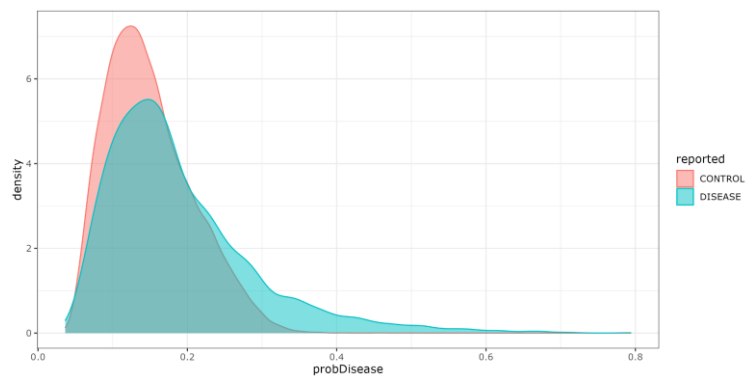

**D. AMP-PD**

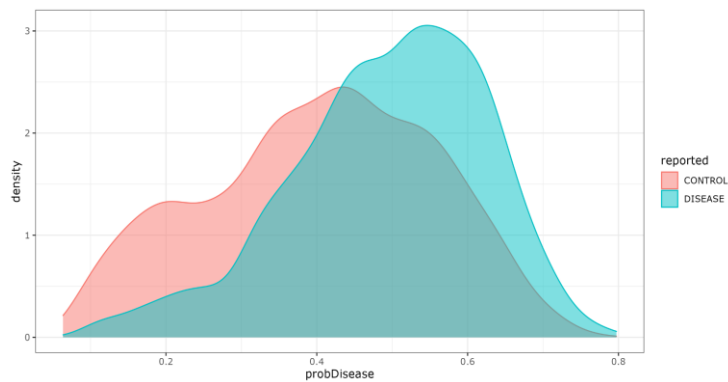

**Supplementary Figure 2.** Quantile-quantile (QQ) plot showing the distribution of p-values from the genome-wide association study meta-analysis of resilience to PD (grey dots) compared to a theoretical distribution of p-values for an equivalent number of variants (red dashed line).

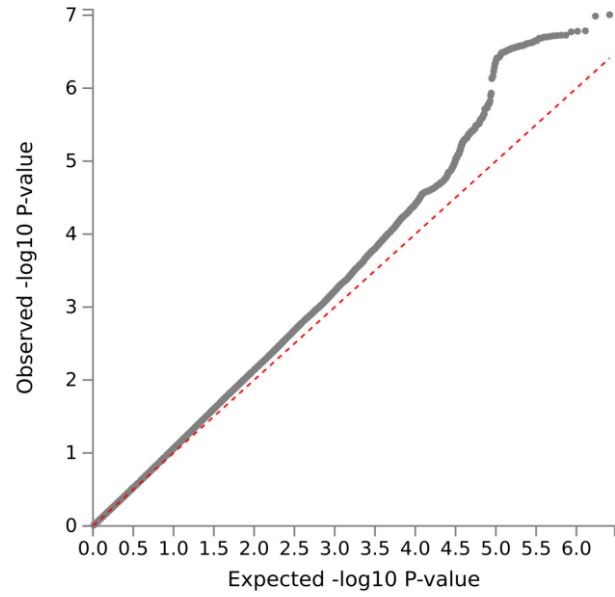

### Supplementary Figure 3. Power calculations at meta-GWAS sample size.

#### A. Top-25% of the data

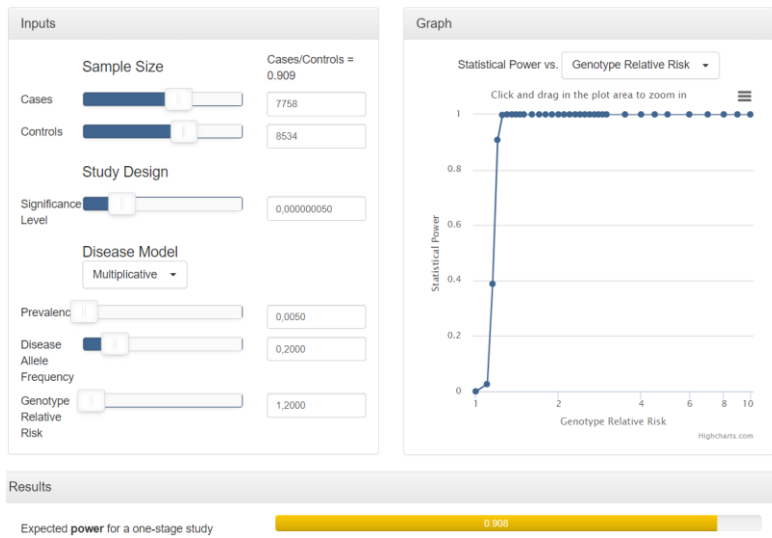

#### B. Top-10% of the data

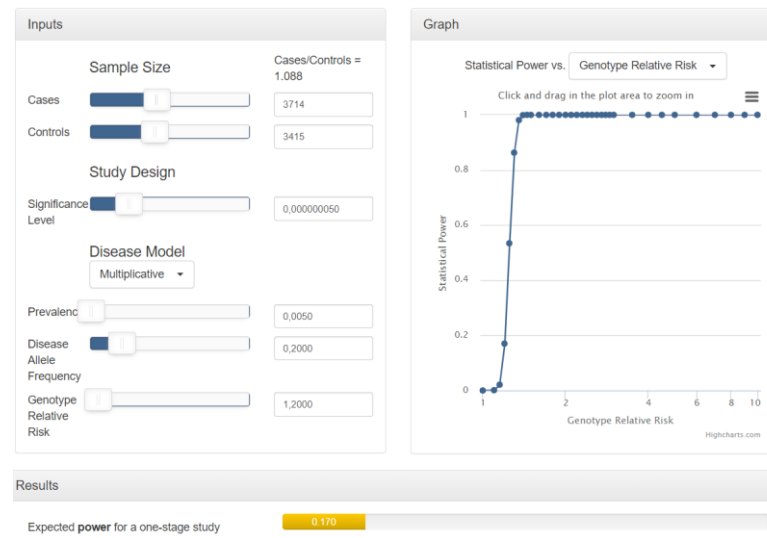



Supplementary Figure 4. Gene-based MAGMA analysis.

A

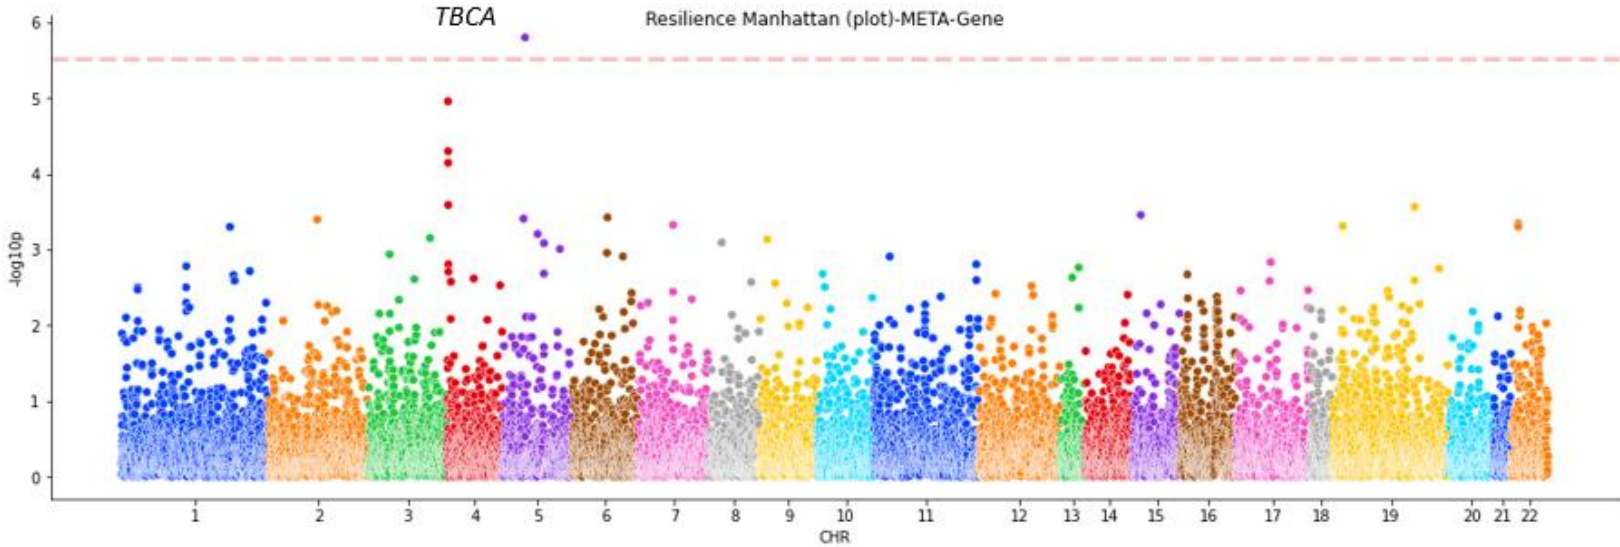

**B**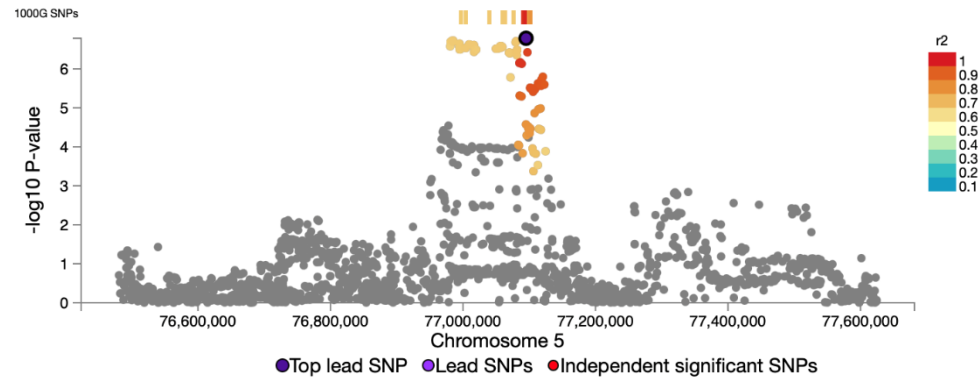**C**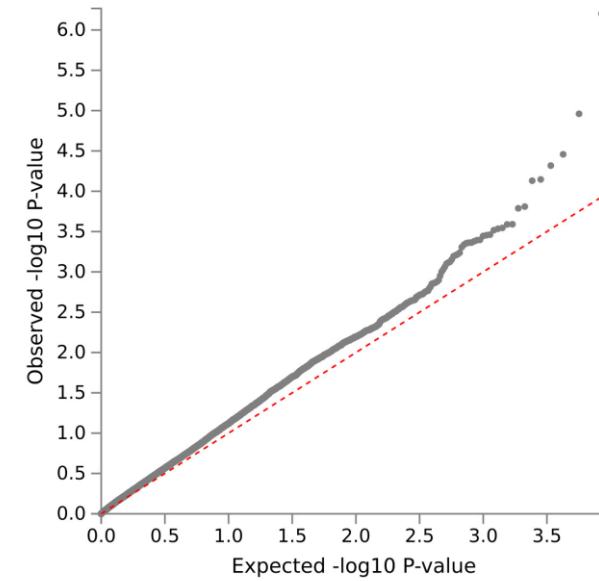

A) Gene-based Manhattan plot. B) Locus zoom plot of the TBCA region nominated through MAGMA gene-based analyses. Each SNP is color-coded based on the highest  $r^2$  to one of the independent significant SNPs if that is greater or equal to the user-defined threshold. Other SNPs (i.e. below the user-defined  $r^2$ ) are colored in grey. The top lead SNPs in genomic risk loci, lead SNPs, and independent significant SNPs are circled in black and colored in dark-purple, purple and red, respectively. C) Quantile-quantile (QQ) plot showing the distribution of p-values from MAGMA gene-based GWAS of resilience to PD (grey dots) compared to a theoretical distribution of p-values for an equivalent number of variants (red dashed line).

**Supplementary Figure 5.** Polygenic resilience score of resilient controls and risk-matching cases.

**A. IPDGC**

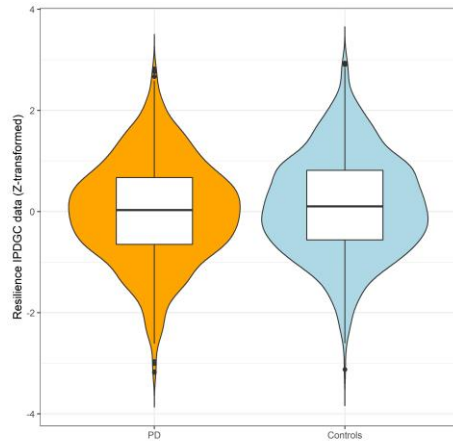

**B. COURAGE-PD**

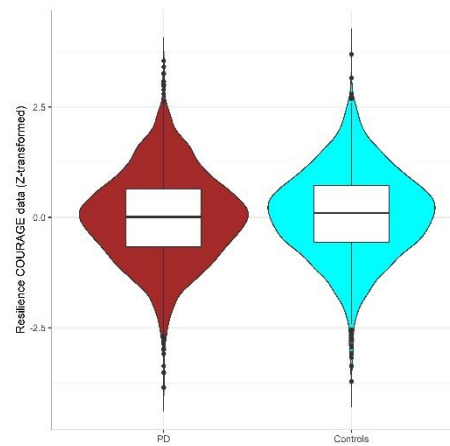

**C. UKBB**

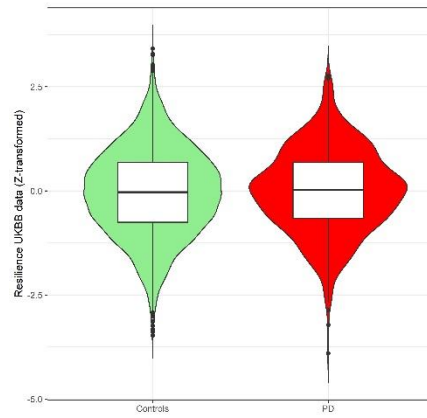

**D. AMP-PD**

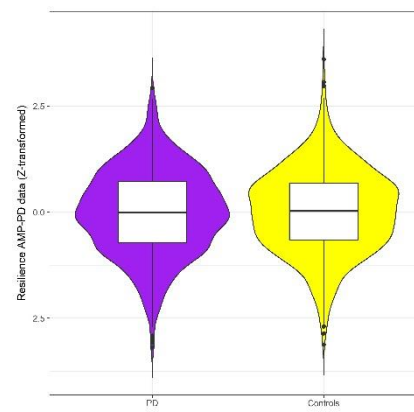

**Supplementary Figure 6.** Correlation between risk and resilience scores in the discovery IPDGC cohort, including 7,204 PD cases and 9,412 controls.

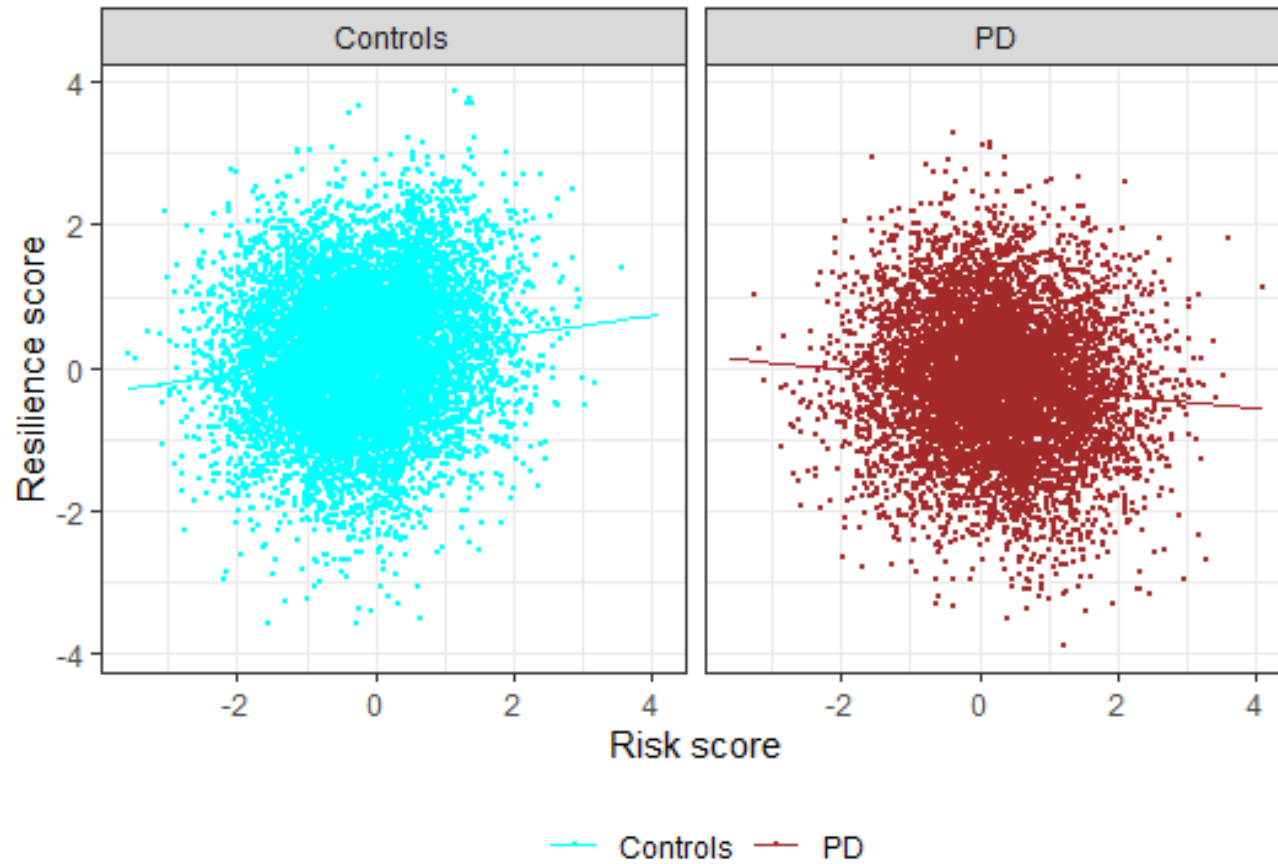

**Supplementary Figure 7.** Tissue specific expression enrichment analyses for PD resilience variants.

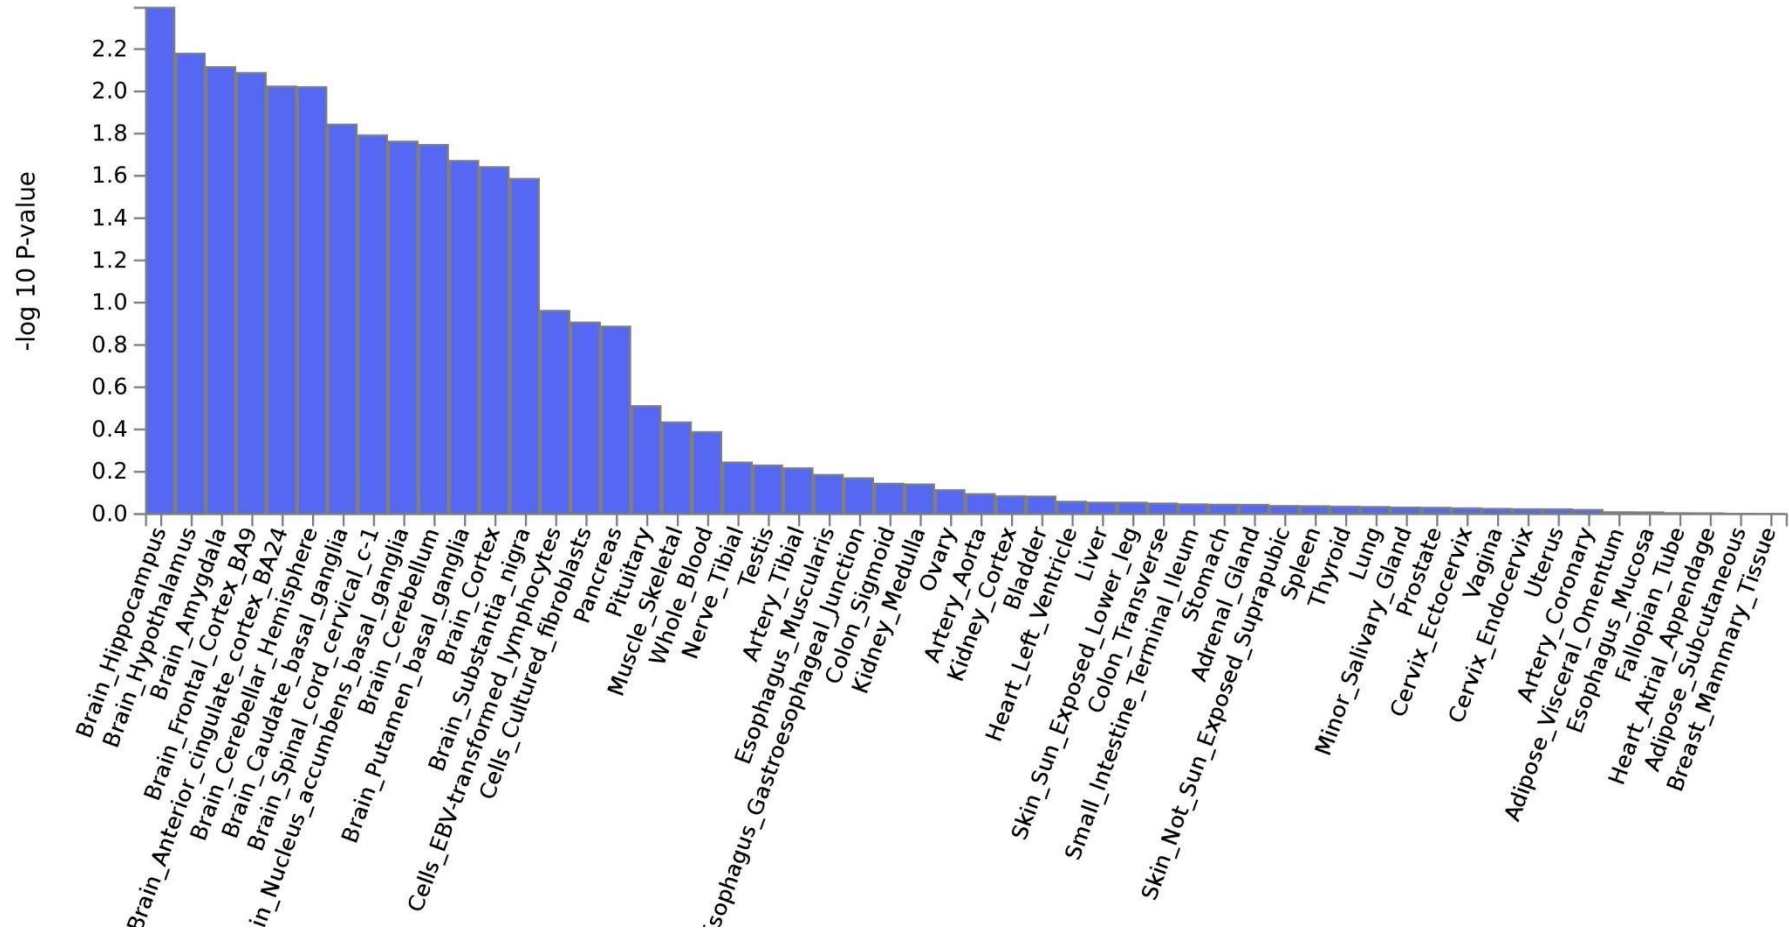



**COURAGE-PD consortium members and affiliations:**

| First Name      | Last Name       | Institute                                                                                                                                                                                                                                                                                     | Country   | E-mail address                            |
|-----------------|-----------------|-----------------------------------------------------------------------------------------------------------------------------------------------------------------------------------------------------------------------------------------------------------------------------------------------|-----------|-------------------------------------------|
| Sulev           | Koks            | Centre for Molecular Medicine and Innovative Therapeutics, Murdoch University, Murdoch, Australia,<br>Perron Institute for Neurological and Translational Science, Nedlands, Western Australia, Australia                                                                                     | Australia | sulev.koks@murdoch.edu.au                 |
| George D        | Mellick         | Griffith Institute for Drug Discovery, Griffith University, Don Young Road, Nathan, Queensland, Australia                                                                                                                                                                                     | Australia | georgedmellick@gmail.com                  |
| Walter          | Pirker          | Department of Neurology, Wilhelminenspital, Austria                                                                                                                                                                                                                                           | Austria   | walter.pirker@gesundheitsverbund.at       |
| Alexander       | Zimprich        | Department of Neurology, Medical University of Vienna, Austria                                                                                                                                                                                                                                | Austria   | alexander.zimprich@meduniwien.ac.at       |
| Anthony E       | Lang            | Edmond J. Safra Program in Parkinson's Disease, Morton and Gloria Shulman Movement Disorders Clinic, Toronto Western Hospital, UHN, Toronto, Ontario, Canada;<br>Division of Neurology, University of Toronto, Toronto, Ontario, Canada;<br>Krembil Brain Institute, Toronto, Ontario, Canada | Canada    | Anthony.Lang@uhnresearch.ca               |
| Ekaterina       | Rogaeva         | Tanz Centre for Research in Neurodegenerative Diseases, University of Toronto, Toronto, Ontario, Canada                                                                                                                                                                                       | Canada    | ekaterina.rogaeva@utoronto.ca             |
| Pille           | Taba            | Department of Neurology and Neurosurgery, University of Tartu, Estonia;<br>Neurology Clinic, Tartu University Hospital, Tartu, Estonia                                                                                                                                                        | Estonia   | Pille.Taba@kliinikum.ee                   |
| Alexis          | Brice           | Sorbonne Université, Institut du Cerveau - Paris Brain Institute - ICM, INSERM, CNRS, Assistance Publique Hôpitaux de Paris, Department of Neurologie, Paris, France                                                                                                                          | France    | alexis.brice@upmc.fr                      |
| Marie-Christine | Chartier-Harlin | Univ. Lille, Inserm, CHU Lille, UMR-S 1172 - JPArc - Centre de Recherche Lille Neurosciences & Cognition, F-59000 Lille, France                                                                                                                                                               | France    | marie-christine.chartier-harlin@inserm.fr |
| Jean-Christophe | Corvol          | Sorbonne Université, Institut du Cerveau - Paris Brain Institute - ICM, INSERM, CNRS, Assistance Publique Hôpitaux de Paris, Department of Neurologie, Paris, France<br>Assistance Publique Hôpitaux de Paris, Department of Neurology, CIC Neurosciences, Paris, France                      | France    | jean-christophe.corvol@aphp.fr            |
| Cloé            | Domenighetti    | Université Paris-Saclay, UVSQ, Univ. Paris-Sud, Inserm, Team " Exposome, heredity, cancer and health ", CESP, 94807, Villejuif, France.                                                                                                                                                       | France    | cloe.domenighetti@inserm.fr               |
| Alexis          | Elbaz           | Université Paris-Saclay, UVSQ, Univ. Paris-Sud, Inserm, Team " Exposome, heredity, cancer and health ", CESP, 94807, Villejuif, France.                                                                                                                                                       | France    | alexis.elbaz@inserm.fr                    |

|                 |                       |                                                                                                                                                                                                                                                                      |         |                                               |
|-----------------|-----------------------|----------------------------------------------------------------------------------------------------------------------------------------------------------------------------------------------------------------------------------------------------------------------|---------|-----------------------------------------------|
| Suzanne         | Lesage                | Sorbonne Université, Institut du Cerveau - Paris Brain Institute - ICM, INSERM, CNRS, Assistance Publique Hôpitaux de Paris, Department of Neurologie, Paris, France                                                                                                 | France  | suzanne.lesage@upmc.fr                        |
| Eugenie         | Mutez                 | Univ. Lille, Inserm, CHU Lille, UMR-S 1172 - JPArc - Centre de Recherche Lille Neurosciences & Cognition, F-59000 Lille, France                                                                                                                                      | France  | eugenie.mutez@chru-lille.fr                   |
| Pierre-Emmanuel | Sugier                | Université Paris-Saclay, UVSQ, Univ. Paris-Sud, Inserm, Team " Exposome, heredity, cancer and health ", CESP, 94807, Villejuif, France.                                                                                                                              | France  | pierre-emmanuel.sugier@inserm.fr              |
| Ashwin          | Ashok Kumar Sreelatha | Centre for Genetic Epidemiology, Institute for Clinical Epidemiology and Applied Biometry , University of Tübingen, Germany                                                                                                                                          | Germany | ashwin.ashok-kumar-sreelatha@uni-tuebingen.de |
| Sandeep         | Grover                | Centre for Genetic Epidemiology, Institute for Clinical Epidemiology and Applied Biometry , University of Tübingen, Germany                                                                                                                                          | Germany | sandeep.grover@uni-tuebingen.de               |
| Kathrin         | Brockmann             | Department for Neurodegenerative Diseases, Hertie Institute for Clinical Brain Research, University of Tübingen, Germany<br>German Center for Neurodegenerative Diseases (DZNE), Tübingen, Germany                                                                   | Germany | kathrin.brockmann@uni-tuebingen.de            |
| Angela B        | Deuschländer          | Department of Neurology, Ludwig Maximilians University of Munich, Germany<br>Department of Neurology, Max Planck Institute of Psychiatry, Munich, Germany<br>Department of Neurology and Department of Clinical Genomics, Mayo Clinic Florida, Jacksonville, FL, USA | Germany | adeutschlaender@gmx.com                       |
| Thomas          | Gasser                | Department for Neurodegenerative Diseases, Hertie Institute for Clinical Brain Research, University of Tübingen, Germany<br>German Center for Neurodegenerative Diseases (DZNE), Tübingen, Germany                                                                   | Germany | thomas.gasser@uni-tuebingen.de                |
| Jens            | Krüger                | Group of Applied Bioinformatics, University of Tübingen, Germany                                                                                                                                                                                                     | Germany | jens.krueger@uni-tuebingen.de.                |
| Peter           | Lichtner              | Institute of Human Genetics, Helmholtz Zentrum München, Neuherberg, Germany.                                                                                                                                                                                         | Germany | lichtner@helmholtz-muenchen.de                |
| Milena          | Radivojkov-Blagojevic | Institute of Human Genetics, Helmholtz Zentrum München, Neuherberg, Germany.                                                                                                                                                                                         | Germany | milena.radivojkov@helmholtz-muenchen.de       |
| Claudia         | Schulte               | Department for Neurodegenerative Diseases, Hertie Institute for Clinical Brain Research, University of Tübingen, Germany.<br>German Center for Neurodegenerative Diseases (DZNE), Tübingen, Germany.                                                                 | Germany | claudia.schulte@uni-tuebingen.de              |
| Manu            | Sharma                | Centre for Genetic Epidemiology, Institute for Clinical Epidemiology and Applied Biometry<br>Department for Neurodegenerative Diseases, Hertie Institute for Clinical Brain Research, University of Tübingen, Germany                                                | Germany | manu.sharma@uni-tuebingen.de                  |



|              |               |                                                                                                                                                                                                                                                                                          |        |                                        |
|--------------|---------------|------------------------------------------------------------------------------------------------------------------------------------------------------------------------------------------------------------------------------------------------------------------------------------------|--------|----------------------------------------|
| Efthimos     | Dardiotis     | Laboratory of Neurogenetics, Department of Neurology, Faculty of Medicine, University of Thessaly, Larissa, Greece                                                                                                                                                                       | Greece | edar@med.uth.gr                        |
| Georges M    | Hadjigeorgiou | Department of Neurology, Medical School, University of Cyprus, Nicosia, Cyprus<br>Department of Neurology, Laboratory of Neurogenetics, University of Thessaly, University Hospital of Larissa, Larissa, Greece                                                                          | Greece | hadjigeorgiou.georgios@ucy.ac.cy       |
| Athina Maria | Simitsi       | 1st Department of Neurology, Eginition Hospital, Medical School, National and Kapodistrian University of Athens, Athens, Greece                                                                                                                                                          | Greece | simitsh@yahoo.gr                       |
| Leonidas     | Stefanis      | Center of Clinical Research, Experimental Surgery and Translational Research, Biomedical Research Foundation of the Academy of Athens, Athens, Greece<br>1st Department of Neurology, Eginition Hospital, Medical School, National and Kapodistrian University of Athens, Athens, Greece | Greece | lstefanis@bioacademy.gr                |
| Grazia       | Annesi        | Institute for Biomedical Research and Innovation, National Research Council, Cosenza, Italy                                                                                                                                                                                              | Italy  | grazia.annesi@cnr.it                   |
| Laura        | Brighina      | Department of Neurology, San Gerardo Hospital, Monza, Italy<br>Department of Medicine and Surgery and Milan Center for Neuroscience, University of Milano Bicocca, Milano, Italy                                                                                                         | Italy  | brighinalaura@hotmail.com              |
| Carlo        | Ferrarese     | Department of Neurology, San Gerardo Hospital, Monza, Italy<br>Department of Medicine and Surgery and Milan Center for Neuroscience, University of Milano Bicocca, Milano, Italy                                                                                                         | Italy  | carlo.ferrarese@unimib.it              |
| Simona       | Petrucci      | Department of Clinical and Molecular Medicine, University of Rome, Italy<br>UOC Medical Genetics and Advanced Cell Diagnostics, S. Andrea University Hospital, Rome, Italy.                                                                                                              | Italy  | simona.petrucci@uniroma1.it            |
| Gianni       | Pezzoli       | Parkinson Institute, Azienda Socio Sanitaria Territoriale (ASST) Gaetano Pini/CTO, Milano, Italy                                                                                                                                                                                         | Italy  | pezzoli@parkinson.it                   |
| Andrea       | Quattrone     | Institute of Neurology, Magna Graecia University, Catanzaro, Italy                                                                                                                                                                                                                       | Italy  | an.quattrone@hotmail.it                |
| Letizia      | Straniero     | Department of Biomedical Sciences, Humanitas University, Milan, Italy                                                                                                                                                                                                                    | Italy  | Letizia.Straniero@humanitasresearch.it |
| Monica       | Gagliardi     | Institute of Molecular Bioimaging and Physiology National Research Council, Catanzaro, Italy                                                                                                                                                                                             | Italy  | monicg_2002@yahoo.it                   |
| Enza Maria   | Valente       | Department of Molecular Medicine, University of Pavia, Italy<br>Istituto di Ricovero e Cura a Carattere Scientifico (IRCCS) Mondino Foundation, Pavia, Italy                                                                                                                             | Italy  | enzamaria.valente@unipv.it             |
| Anna         | Zecchinelli   | Parkinson Institute, Azienda Socio Sanitaria Territoriale (ASST) Gaetano Pini/CTO, Milano, Italy                                                                                                                                                                                         | Italy  | Anna.Zecchinelli@asst-pini-cto.it      |
| Nobutaka     | Hattori       | Department of Neurology, Juntendo University School of Medicine, Bunkyo-ku, Tokyo 113-8421, Japan                                                                                                                                                                                        | Japan  | nhattori@juntendo.ac.jp                |

|                |                |                                                                                                                                                                                                                                                                                                                                                                                       |             |                                    |
|----------------|----------------|---------------------------------------------------------------------------------------------------------------------------------------------------------------------------------------------------------------------------------------------------------------------------------------------------------------------------------------------------------------------------------------|-------------|------------------------------------|
| Akiyoshi       | Nakayama       | Department of Integrative Physiology and Bio-Nano Medicine, National Defense Medical College, Saitama 359-8513, Japan.                                                                                                                                                                                                                                                                | Japan       | aknak@ndmc.ac.jp                   |
| Hiroataka      | Matsuo         | Department of Integrative Physiology and Bio-Nano Medicine, National Defense Medical College, Saitama 359-8513, Japan                                                                                                                                                                                                                                                                 | Japan       | matsuo29@gmail.com                 |
| Kenya          | Nishioka       | Department of Neurology, Juntendo University School of Medicine, Bunkyo-ku, Tokyo 113-8421, Japan                                                                                                                                                                                                                                                                                     | Japan       | nishioka@juntendo.ac.jp            |
| Dheeraj        | Bobbili        | Bioinformatics Core, Luxembourg Centre for Systems Biomedicine (LCSB), University of Luxembourg, Esch-Belval, Luxembourg.                                                                                                                                                                                                                                                             | Luxembourg  | dheeraj.bobbili@uni.lu             |
| Rejko          | Kruger         | Translational Neuroscience, Luxembourg Centre for Systems Biomedicine (LCSB), University of Luxembourg, Esch-Belval, Luxembourg<br>Neurology, Centre Hospitalier de Luxembourg, Luxembourg, Luxembourg<br>Parkinson's Research Clinic, Centre Hospitalier de Luxembourg, Luxembourg<br>Transversal Translational Medicine, Luxembourg Institute of Health (LIH), Strassen, Luxembourg | Luxembourg  | rejko.krueger@uni.lu               |
| Zied           | Landoulsi      | Bioinformatics Core, Luxembourg Centre for Systems Biomedicine (LCSB), University of Luxembourg, Esch-Belval, Luxembourg                                                                                                                                                                                                                                                              | Luxembourg  | zied.landoulsi@uni.lu              |
| Patrick        | May            | Bioinformatics Core, Luxembourg Centre for Systems Biomedicine (LCSB), University of Luxembourg, Esch-Belval, Luxembourg.                                                                                                                                                                                                                                                             | Luxembourg  | patrick.may@uni.lu                 |
| Lukas          | Pavelka        | Neurology, Centre Hospitalier de Luxembourg, Luxembourg, Luxembourg                                                                                                                                                                                                                                                                                                                   | Luxembourg  | lukas.pavelka@uni.lu               |
| Bastiaan R     | Bloem          | Radboud University Medical Centre, Donders Institute for Brain, Cognition and Behaviour, Department of Neurology, Nijmegen, The Netherlands.                                                                                                                                                                                                                                          | Netherlands | bas.bloem@radboudumc.nl            |
| Bart PC van de | Warrenburg     | Radboud University Medical Centre, Donders Institute for Brain, Cognition and Behaviour, Department of Neurology, Nijmegen, The Netherlands.                                                                                                                                                                                                                                          | Netherlands | Bart.vandeWarrenburg@radboudumc.nl |
| Jan            | Aasly          | Department of Neurology, St Olav's Hospital and Norwegian University of Science and Technology, Trondheim, Norway                                                                                                                                                                                                                                                                     | Norway      | jan.aasly@ntnu.no                  |
| Lasse          | Pihlstrøm      | Department of Neurology, Oslo University Hospital, Oslo, Norway                                                                                                                                                                                                                                                                                                                       | Norway      | lasse.pihlstrom@medisin.uio.no     |
| Mathias        | Toft           | Department of Neurology, Oslo University Hospital, Oslo, Norway                                                                                                                                                                                                                                                                                                                       | Norway      | mathias.toft@gmail.com             |
| Joaquim J      | Ferreira       | Instituto de Medicina Molecular João Lobo Antunes, Faculdade de Medicina, Universidade de Lisboa, Lisbon, Portugal<br>Laboratory of Clinical Pharmacology and Therapeutics, Faculdade de Medicina, Universidade de Lisboa, Lisbon, Portugal                                                                                                                                           | Portugal    | joaquimjferreira@gmail.com         |
| Leonor         | Correia Guedes | Instituto de Medicina Molecular João Lobo Antunes, Faculdade de Medicina, Universidade de Lisboa, Lisbon, Portugal.<br>Campus Neurológico Sénior, Torres Vedras, Portugal.                                                                                                                                                                                                            | Portugal    | lcorreialedes@gmail.com            |

|           |             |                                                                                                                                                                                                                                                                                                                                               |              |                             |
|-----------|-------------|-----------------------------------------------------------------------------------------------------------------------------------------------------------------------------------------------------------------------------------------------------------------------------------------------------------------------------------------------|--------------|-----------------------------|
|           |             | Department of Neurosciences and Mental Health, Neurology, Hospital de Santa Maria, CHULN, Lisbon, Portugal.                                                                                                                                                                                                                                   |              |                             |
| Soraya    | Bardien     | Division of Molecular Biology and Human Genetics, Department of Biomedical Sciences, Faculty of Medicine and Health Sciences, Stellenbosch University, South Africa; South African Medical Research Council/ Stellenbosch University Genomics of Brain Disorders Research Unit, Cape Town, South Africa                                       | South Africa | sbardien@sun.ac.za          |
| Jonathan  | Carr        | Division of Neurology, Department of Medicine, Faculty of Medicine and Health Sciences, Stellenbosch University, South Africa; South African Medical Research Council/ Stellenbosch University Genomics of Brain Disorders Research Unit, Cape Town, South Africa                                                                             | South Africa | jcarr@sun.ac.za             |
| Sun Ju    | Chung       | Department of Neurology, Asan Medical Center, University of Ulsan College of Medicine, Seoul, South Korea                                                                                                                                                                                                                                     | South Korea  | sunjubrain@gmail.com        |
| Yun Joong | Kim         | Department of Neurology, Yongin Severance Hospital, Yonsei University College of Medicine, Seoul, South Korea                                                                                                                                                                                                                                 | South Korea  | yunjkim@yuhs.ac             |
| Monica    | Diez-Fairen | Fundació per la Recerca Biomèdica i Social Mútua Terrassa, Terrassa, Barcelona, Spain;<br>Movement Disorders Unit, Department of Neurology, Hospital Universitari Mutua de Terrassa, Terrassa, Barcelona, Spain                                                                                                                               | Spain        | monicadifa@gmail.com        |
| Mario     | Ezquerria   | Lab of Parkinson Disease and Other Neurodegenerative Movement Disorders, Institut d'Investigacions Biomèdiques August Pi i Sunyer (IDIBAPS), Institut de Neurociències, Universitat de Barcelona, ES-08036 Barcelona, Catalonia, Spain                                                                                                        | Spain        | ezquerria@clinic.cat        |
| Pau       | Pastor      | Fundació per la Recerca Biomèdica i Social Mútua Terrassa, Terrassa, Barcelona, Spain;<br>Movement Disorders Unit, Department of Neurology, Hospital Universitari Mutua de Terrassa, Terrassa, Barcelona, Spain                                                                                                                               | Spain        | pastorpau@gmail.com         |
| Eduardo   | Tolosa      | Parkinson's disease & Movement Disorders Unit, Neurology Service, Hospital Clínic de Barcelona, Institut d'Investigacions Biomèdiques August Pi i Sunyer (IDIBAPS), University of Barcelona, Barcelona, Spain Centro de Investigación Biomédica en Red sobre Enfermedades Neurodegenerativas (CIBERNED: CB06/05/0018-ISCIII) Barcelona, Spain | Spain        | etolosa@clinic.cat          |
| Andrea C  | Belin       | Department of Neuroscience, Karolinska Institutet, Stockholm, Sweden                                                                                                                                                                                                                                                                          | Sweden       | Andrea.Carmine.Belin@ki.se  |
| Nancy L   | Pedersen    | Department of Medical Epidemiology and Biostatistics, Karolinska Institutet, Stockholm, Sweden                                                                                                                                                                                                                                                | Sweden       | nancy.pedersen@ki.se        |
| Andreas   | Puschmann   | Lund University, Skåne University Hospital, Department of Clinical Sciences Lund, Neurology, Getingevägen 4, 221 85, Lund, Sweden.                                                                                                                                                                                                            | Sweden       | andreas.puschmann@med.lu.se |

|          |            |                                                                                                                                                                                                                                                                                                                                                                            |        |                                |
|----------|------------|----------------------------------------------------------------------------------------------------------------------------------------------------------------------------------------------------------------------------------------------------------------------------------------------------------------------------------------------------------------------------|--------|--------------------------------|
| Caroline | Ran        | Department of Neuroscience, Karolinska Institutet, Stockholm, Sweden                                                                                                                                                                                                                                                                                                       | Sweden | Caroline.Ran@ki.se             |
| Emil Y   | Rödström   | Lund University, Skåne University Hospital, Department of Clinical Sciences Lund, Neurology, Getingevägen 4, 221 85, Lund, Sweden                                                                                                                                                                                                                                          | Sweden | emil.ygland_rodstrom@med.lu.se |
| Karin    | Wirdefeldt | Department of Medical Epidemiology and Biostatistics, Karolinska Institutet, Stockholm, Sweden<br>Department of Clinical Neuroscience, Karolinska Institutet, Stockholm, Sweden                                                                                                                                                                                            | Sweden | Karin.Wirdefeldt@ki.se         |
| Carl E   | Clarke     | University of Birmingham and Sandwell and West Birmingham Hospitals NHS Trust, United Kingdom                                                                                                                                                                                                                                                                              | UK     | carlclarke@nhs.net             |
| Karen E  | Morrison   | Faculty of Medicine, Health and Life Sciences, Queens University, Belfast, United Kingdom                                                                                                                                                                                                                                                                                  | UK     | k.morrison@qub.ac.uk           |
| Manuela  | Tan        | Department of Clinical and Movement Neurosciences, UCL Queen Square Institute of Neurology, University College London, London, UK                                                                                                                                                                                                                                          | UK     | manuela.tan@ucl.ac.uk          |
| Connor   | Edsall     | Molecular Genetics Section, Laboratory of Neurogenetics, NIA, NIH, Bethesda, MD 20892, USA                                                                                                                                                                                                                                                                                 | US     | Cwedsall@vt.edu                |
| Matt J   | Farrer     | Department of Neurology, McKnight Brain Institute, University of Florida, Gainesville, FL, USA                                                                                                                                                                                                                                                                             | US     | m.farrer@ufl.edu               |
| Dimitri  | Krainc     | Department of Neurology, Northwestern University Feinberg School of Medicine, Chicago, Illinois 60611, United States                                                                                                                                                                                                                                                       | US     | krainc@northwestern.edu        |
| Andrew B | Singleton  | Molecular Genetics Section, Laboratory of Neurogenetics, NIA, NIH, Bethesda, MD 20892, USA<br>Center For Alzheimer's and Related Dementias, NIA, NIH, Bethesda, MD 20892, USA                                                                                                                                                                                              | US     | singleta@mail.nih.gov          |
| Lena F   | Burbulla   | Department of Neurology, Northwestern University Feinberg School of Medicine, Chicago, IL 60611, USA<br>German Center for Neurodegenerative Diseases (DZNE), Munich, Germany<br>Metabolic Biochemistry, Biomedical Center 13 (BMC), Faculty of Medicine, Ludwig-Maximilians University, Munich, Germany<br>Munich Cluster for Systems Neurology (SyNergy), Munich, Germany | US     | lena.burbulla@northwestern.edu |
| Dena G   | Hernandez  | Molecular Genetics Section, Laboratory of Neurogenetics, NIA, NIH, Bethesda, MD 20892, USA                                                                                                                                                                                                                                                                                 | US     | dh326e@nih.gov                 |

## **AMP-PD acknowledgement:**

We would like to thank all members of the Comprehensive Unbiased Risk factor Assessment for Genetics and Environment in Parkinson's Disease (COURAGE-PD) Consortium. The COURAGE-PD consortium is conducted under a partnership agreement between 35 studies. The COURAGE-PD consortium is supported by the EU Joint Program for Neurodegenerative Disease research (JPND; <https://www.neurodegenerationresearch.eu/initiatives/annual-calls-for-proposals/closed-calls/risk-factors-2012/risk-factor-call-results/courage-pd/>, grant 01ED1406).

We would like to thank AMP-PD for the publicly available whole-genome sequencing data. Clinical data and biosamples used in preparation of this article were obtained from the Michael J. Fox Foundation (MJFF) and National Institutes of Neurological Disorders and Stroke (NINDS) BioFIND study, Harvard Biomarkers Study (HBS), the NIA International Lewy Body Dementia Genetics Consortium Genome Sequencing in Lewy body dementia case-control cohort (LBD), the MJFF LRRK2 Cohort Consortium (LCC), the NINDS Parkinson's disease Biomarkers Program (PDBP), MJFF Parkinson's Progression Marker Initiative (PPMI), and the NINDS Study of Isradipine as a Disease Modifying Agent in Subjects With Early Parkinson Disease, Phase 3 (STEADY-PD3). BioFIND is sponsored by The Michael J. Fox Foundation for Parkinson's Research (MJFF) with support from the National Institute for Neurological Disorders and Stroke (NINDS). The BioFIND Investigators have not participated in reviewing the data analysis or content of the manuscript. For up-to-date information on the study, visit [michaeljfox.org/news/biofind](http://michaeljfox.org/news/biofind). Genome sequence data for the Lewy body dementia case-control cohort were generated at the Intramural Research Program of the U.S. National Institutes of Health. The study was supported in part by the National Institute on Aging (program #: 1ZIAAG000935) and the National Institute of Neurological Disorders and Stroke (program #: 1ZIANS003154). The Harvard NeuroDiscovery Biomarker Study (HBS) is a collaboration of HBS investigators [full list of HBS investigator found at <https://www.bwhparkinsoncenter.org/biobank/> and funded through philanthropy and NIH and Non-NIH funding sources. The HBS Investigators have not participated in reviewing the data analysis or content of the manuscript. The LRRK2 Cohort Consortium is coordinated and funded by The Michael J. Fox Foundation for Parkinson's Research. Data used in preparation of this article were obtained from the MJFF-sponsored LRRK2 Cohort Consortium (LCC). The LCC Investigators have not participated in reviewing the data analysis or content of the manuscript. For up-to-date information on the study, visit <https://www.michaeljfox.org/biospecimens>. PPMI – a public-private partnership – is funded by the Michael J. Fox Foundation for Parkinson's Research and funding partners, including [list the full names of all of the PPMI funding partners found at [www.ppmi-info.org/fundingpartners](http://www.ppmi-info.org/fundingpartners). The PPMI Investigators have not participated in reviewing the data analysis or content of the manuscript. For up-to-date information on the study, visit [www.ppmi-info.org](http://www.ppmi-info.org). Parkinson's Disease Biomarker Program (PDBP) consortium is supported by the National Institute of Neurological Disorders and Stroke (NINDS) at the National Institutes of Health. A full list of PDBP investigators can be

found at <https://pdbp.ninds.nih.gov/policy>. The PDBP Investigators have not participated in reviewing the data analysis or content of the manuscript. The Study of Isradipine as a Disease Modifying Agent in Subjects With Early Parkinson Disease, Phase 3 (STEADY-PD3) is funded by the National Institute of Neurological Disorders and Stroke (NINDS) at the National Institutes of Health with support from the Michael J. Fox Foundation and the Parkinson Study Group. For additional study information, visit <https://clinicaltrials.gov/ct2/show/study/NCT02168842>. The STEADY-PD3 investigators have not participated in reviewing the data analysis or content of the manuscript. The Study of Urate Elevation in Parkinson's Disease, Phase 3 (SURE-PD3) is funded by the National Institute of Neurological Disorders and Stroke (NINDS) at the National Institutes of Health with support from the Michael J. Fox Foundation and the Parkinson Study Group. For additional study information, visit <https://clinicaltrials.gov/ct2/show/NCT02642393>. The SURE-PD3 investigators have not participated in reviewing the data analysis or content of the manuscript. The LRRK2 Cohort Consortium (LCC) was created to assemble and study groups of people with and without Parkinson's disease who carry mutations in the LRRK2 gene. The LRRK2 Cohort Consortium is coordinated and funded by The Michael J. Fox Foundation for Parkinson's Research. The investigators within the LCC contributed to the design and implementation of the LCC and/or provided data and/or collected biospecimens, but did not necessarily participate in the analysis or writing of this report. The full list of LCC investigators can be found at [www.michaeljfox.org/lccinvestigators](http://www.michaeljfox.org/lccinvestigators). This work utilized the computational resources of the NIH HPC Biowulf cluster (<http://hpc.nih.gov>).
